# Supplementary material for: A Systematic Review of Patient Acceptance of Consumer Health Information Technology
Source: Oxford University Press journal article supplement (doi:10.1197/jamia.m2888), 2009-04-24
Supplement: jamia_supp_mat_jamia.M2888.pdf [file jamia_supp_mat_jamia.M2888.pdf]

Table 1. Characteristics of the 52 reviewed studies

| Study                                     | Type of application                      | Design                                                                                                                              | Method and dependent variable (DV)                                                                                                                                                                                                                       | Type of patient              | N     | Location |
|-------------------------------------------|------------------------------------------|-------------------------------------------------------------------------------------------------------------------------------------|----------------------------------------------------------------------------------------------------------------------------------------------------------------------------------------------------------------------------------------------------------|------------------------------|-------|----------|
| Schatell et al., 2006 <sup>51</sup>       | Health Internet site                     | Cross-sectional study—a national sample of 37 dialysis clinics was obtained through the End-Stage Renal Disease Network             | Self-reported demographic information; hospital registry for medical information; DV: acceptance was indicated by the response to the question “Do you use the Internet to seek health information?”                                                     | Renal disease                | 1,804 | USA      |
| Mancini et al., 2006 <sup>52</sup>        | Health Internet site                     | Cross-sectional study—a secondary analysis that included patients attending genetic clinics                                         | Self-reported demographic information; DV: acceptance was indicated by the response to the question “Do you sometimes use the Internet to look for information about health?”                                                                            | Women with breast cancer     | 560   | France   |
| Siva et al., 2008 <sup>53</sup>           | Internet-based secure e-mail application | Cross-sectional study—consecutive patients drawn from a university outpatient rheumatology clinic                                   | Self-reported demographic information; DV: self-reported interest in using e-mail to communicate with their rheumatologist                                                                                                                               | Rheumatic diseases           | 145   | USA      |
| Gordon et al., 2002 <sup>53</sup>         | Health Internet site                     | Cross-sectional study—consecutive patients drawn from general rheumatology clinics in two teaching hospitals                        | Case record review for rheumatological diagnosis, disease duration, and comorbid conditions; Carstairs code for social deprivation; DV: self-reported frequency of use                                                                                   | Rheumatic diseases           | 138   | UK       |
| Metz et al., 2003 <sup>50</sup>           | Health Internet site                     | Cross-sectional study—consecutive patients drawn from oncology centers, community, and Veterans hospitals                           | Chart review for demographic information; validated survey was used; DV: self-reported use*                                                                                                                                                              | Radiation oncology           | 921   | USA      |
| Smith et al., 2003 <sup>54</sup>          | Health Internet site                     | Cross-sectional study—consecutive sample drawn from an academic center, a Veterans Affairs Medical Center, and a community hospital | Chart review for demographic information; validated survey was used; DV: self-reported use*                                                                                                                                                              | Prostate cancer              | 295   | USA      |
| O’Connor and Johanson, 2000 <sup>55</sup> | Health Internet site                     | Cross-sectional study—consecutive sample drawn from two gastroenterology clinics                                                    | Self-reported demographic information; DV: self-reported frequency of health-related Web use in the past and intention to use in the future                                                                                                              | Gastroenterology outpatients | 924   | USA      |
| Aydin et al., 2004 <sup>56</sup>          | Health Internet site                     | Cross-sectional study—consecutive sample obtained from a university dental school over a 2-month period                             | Self-reported demographic information; DV: self-reported frequency of use                                                                                                                                                                                | Dental outpatients           | 400   | Turkey   |
| Mead et al., 2003 <sup>29</sup>           | Health Internet site                     | Cross-sectional study—consecutive sample obtained over a five-day period                                                            | Self-reported demographic information, attitudes toward the CHIT; DV: self-reported level of interest in using the CHIT                                                                                                                                  | Primary care practice        | 660   | UK       |
| Helft et al., 2005 <sup>57</sup>          | Health Internet site                     | Cross-sectional study—convenience sample drawn from an oncology specialty outpatient clinic                                         | Self-reported demographic and health information; DV: acceptance was indicated by the response to the question “Do you ever use the Internet to get information about your cancer?”; measures were developed in the study or adapted from prior research | Oncology specialty clinic    | 200   | USA      |
| Tak and Hong, 2005 <sup>58</sup>          | Health Internet site                     | Cross-sectional study—convenience sample drawn from programs of an arthritis foundation, senior centers, and grocery stores         | Self-reported demographic and health information; DV: self-reported use*                                                                                                                                                                                 | Older adults with arthritis  | 71    | USA      |

Or – Patient CHIT Acceptance Systematic Review

| Study                                    | Type of application                      | Design                                                                                                                                  | Method and dependent variable (DV)                                                                                                                                                                                                            | Type of patient                                                         | N      | Location |
|------------------------------------------|------------------------------------------|-----------------------------------------------------------------------------------------------------------------------------------------|-----------------------------------------------------------------------------------------------------------------------------------------------------------------------------------------------------------------------------------------------|-------------------------------------------------------------------------|--------|----------|
| Salo et al., 2004 <sup>59</sup>          | Health Internet site                     | Cross-sectional study—convenience sample obtained from an inner city emergency department over a 7-month period                         | Self-reported demographic and health information; DV: self-reported level of interest in accessing a medical-related Web sites                                                                                                                | Patients used the emergency department                                  | 328    | USA      |
| Cima et al., 2007 <sup>76</sup>          | Health Internet site                     | Cross-sectional study—convenience sample of patients at a tertiary-care institution's inflammatory bowel disease clinic                 | Self-reported demographic information; DV: self-reported Internet use for health-related information in the past                                                                                                                              | Inflammatory bowel disease                                              | 169    | USA      |
| Fogel et al., 2002 <sup>60</sup>         | Health Internet site                     | Cross-sectional study—participants were identified from hospital tumor-registry records                                                 | Self-reported demographic information; hospital registry for medical information; DV: acceptance was indicated by the response to the question "Do you use the World Wide Web for information regarding breast health/women's health issues?" | Women with breast cancer                                                | 188    | USA      |
| Klein, 2007 <sup>92</sup>                | Internet-based secure e-mail application | Cross-sectional study—participation solicitation and survey administration through a Web site to first-time patient users of the system | Constructs measured using validated scales; DV: acceptance was indicated by both self-reported intention to use and objective measure of use                                                                                                  | Patients within the service provider network                            | 143    | USA      |
| Smith-Barbaro et al., 2001 <sup>61</sup> | Health Internet site                     | Cross-sectional study—patients at seven family practice clinics were surveyed                                                           | Self-reported demographic information; DV: self-reported intention to use                                                                                                                                                                     | Family medicine                                                         | 595    | USA      |
| Lai et al., 2008 <sup>91</sup>           | Computer-based health support system     | Cross-sectional study—patients recruited from HIV/AIDS clinics                                                                          | Constructs measured using validated scales and an objective measure; DV: self-reported intention to use                                                                                                                                       | HIV/AIDS                                                                | 32     | USA      |
| Tassone et al., 2004 <sup>62</sup>       | Health Internet site                     | Cross-sectional study—questionnaires were handed out over a randomly selected month                                                     | Self-reported demographic information; DV: acceptance was indicated by the response to the question "Did you look up your condition on the Internet?"; questions adapted from prior study                                                     | Otolaryngology outpatients                                              | 535    | UK       |
| Diaz et al., 2002 <sup>63</sup>          | Health Internet site                     | Cross-sectional study—random sample drawn from a primary care internal medicine private practice                                        | Self-reported demographic information; DV: self-reported frequency of use                                                                                                                                                                     | Internal medicine practice                                              | 512    | USA      |
| Millard and Fintak, 2002 <sup>49</sup>   | Health Internet site                     | Cross-sectional study—random sample drawn from an online database                                                                       | Self-reported demographic and health information; DV: self-reported level of Internet use to obtain health-related information                                                                                                                | Chronically ill (including seasonal allergies, arthritis, hypertension) | 10,069 | USA      |
| Chae et al., 2001 <sup>81</sup>          | Telemedicine                             | Cross-sectional study—random sample obtained from a home health service patient population over a 8-month period                        | Self-reported demographic and health information; DV: self-reported satisfaction level of telemedicine                                                                                                                                        | Home health care elderly patients                                       | 50     | Korea    |
| Dugaw et al., 2000 <sup>85</sup>         | Computer-based health support system     | Cross-sectional study—random sample obtained over a 3-month period                                                                      | Self-reported demographic information; DV: acceptance was measured using a 12-item acceptability survey                                                                                                                                       | Patients used the emergency room walk-in clinic for care                | 100    | USA      |
| Lake et al., 2004 <sup>64</sup>          | Health Internet site                     | Cross-sectional study—sample drawn from 5 outpatient colorectal surgery clinics over a 2-month period                                   | Self-reported demographic information; DV: self-reported frequency of use                                                                                                                                                                     | Colorectal surgery outpatients                                          | 298    | USA      |

Or – Patient CHIT Acceptance Systematic Review

| Study                                  | Type of application                  | Design                                                                                                                                                 | Method and dependent variable (DV)                                                                                                                                                                                                          | Type of patient                                | N     | Location    |
|----------------------------------------|--------------------------------------|--------------------------------------------------------------------------------------------------------------------------------------------------------|---------------------------------------------------------------------------------------------------------------------------------------------------------------------------------------------------------------------------------------------|------------------------------------------------|-------|-------------|
| Sabel et al., 2005 <sup>65</sup>       | Health Internet site                 | Cross-sectional study—sample drawn from a database that included patients with melanoma                                                                | Database captured demographic information and histologic slides review to determine disease severity; DV: acceptance was indicated by the response to the question “Did you research any information on melanoma on the computer/Internet?” | Melanoma                                       | 1,613 | USA         |
| Peterson and Fretz, 2003 <sup>66</sup> | Health Internet site                 | Cross-sectional study—sample drawn from a multidisciplinary thoracic oncology clinic over a 3-month period                                             | Self-reported demographic information and level of use; DV: self-reported intention to use                                                                                                                                                  | Lung cancer clinic                             | 139   | USA         |
| Lober et al., 2005 <sup>86</sup>       | Computer-based health support system | Cross-sectional study—sample drawn from a publicly subsidized housing project that housed 170 residents over a 6-month period                          | Field study; DV: observed usage patterns through both electronic logs and the researchers                                                                                                                                                   | Elderly patient residents of housing authority | 38    | USA         |
| Williams et al., 2001 <sup>79</sup>    | Teledermatology                      | Cross-sectional study—sample drawn from a teledermatology clinic                                                                                       | Dermatology Life Quality Index to measure perceived quality of life; DV: acceptance was indicated by satisfaction with teledermatology; survey adapted from prior study                                                                     | Skin-related problems                          | 123   | UK          |
| Jeannot et al., 2004 <sup>67</sup>     | Health Internet site                 | Cross-sectional study—sample drawn from eight medical practices over a 1-month period                                                                  | Self-reported demographic information; physicians determined patients’ disease category; DV: self-reported frequency of use                                                                                                                 | Primary care and gastroenterology              | 1,604 | Switzerland |
| Gustke et al., 2000 <sup>83</sup>      | Telemedicine                         | Cross-sectional study—sample drawn from telemedicine outreach facilities                                                                               | Self-reported demographic information; DV: satisfaction with telemedicine using a 10-item satisfaction questionnaire                                                                                                                        | Primary care and specialist consultations      | 495   | USA         |
| Birkmann et al., 2006 <sup>68</sup>    | Health Internet site                 | Cross-sectional study—sample drawn from the 367 medical practices of a medical practices’ network                                                      | Self-reported demographic and health information; DV: self-reported use and intention to use; survey was validated in the study                                                                                                             | Medical practice sites                         | 2,272 | Germany     |
| Murero et al., 2001 <sup>48</sup>      | Health Internet site                 | Cross-sectional study—sample drawn from the population in which patients had previously undergone coronary artery bypass grafting                      | Semi-structured questionnaire; DV: self-reported previous use of the system*                                                                                                                                                                | Cardiopathic                                   | 82    | USA         |
| Dickerson et al., 2004 <sup>69</sup>   | Health Internet site                 | Cross-sectional study—sample drawn from three primary care practices; consecutive sample obtained for one practice and random sample for the other two | Patient chart review to determine health status; DV: self-reported level of access                                                                                                                                                          | Primary care practice                          | 315   | USA         |
| Wilson and Lankton, 2004 <sup>87</sup> | Computer-based health support system | Cross-sectional study—sample obtained by administering online questionnaires to patients who had registered for access to the e-health                 | Constructs measured using validated scales; DV: self-reported intention to use                                                                                                                                                              | Patients registered for e-health service       | 163   | USA         |
| Pautler et al., 2001 <sup>70</sup>     | Health Internet site                 | Cross-sectional study—sample obtained by mailing the questionnaires to individuals who were diagnosed with prostate cancer                             | Self-reported demographic information; DV: self-reported frequency of use                                                                                                                                                                   | Prostate cancer                                | 312   | Canada      |
| Wolf et al., 2004 <sup>71</sup>        | Health Internet site                 | Cross-sectional study—sample obtained from a hand surgery practice                                                                                     | Self-reported demographic information; DV: self-reported level of access                                                                                                                                                                    | Hand surgery                                   | 120   | USA         |

Or – Patient CHIT Acceptance Systematic Review

| Study                                   | Type of application                  | Design                                                                                                                                                                                                                                              | Method and dependent variable (DV)                                                                                                                                                                                                                                     | Type of patient                                                                                  | N                                                                     | Location    |
|-----------------------------------------|--------------------------------------|-----------------------------------------------------------------------------------------------------------------------------------------------------------------------------------------------------------------------------------------------------|------------------------------------------------------------------------------------------------------------------------------------------------------------------------------------------------------------------------------------------------------------------------|--------------------------------------------------------------------------------------------------|-----------------------------------------------------------------------|-------------|
| Mekhjian et al., 1999 <sup>84</sup>     | Telemedicine                         | Cross-sectional study—sample obtained from a prison in which inmate patients participated in teleconsultations                                                                                                                                      | DV: Self-reported satisfaction with telemedicine                                                                                                                                                                                                                       | Various including pulmonary, plastic surgery, gastroenterology, psychiatry, general survey, etc. | 221                                                                   | USA         |
| Khazaal et al., 2008 <sup>77</sup>      | Health Internet site                 | Cross-sectional study—sample obtained from a university psychiatry department outpatient clinic over a 4-month period                                                                                                                               | Self-reported demographic information; DV: self-reported use of the Internet for medical purpose                                                                                                                                                                       | Psychiatric disorders                                                                            | 319                                                                   | Switzerland |
| Pereira et al., 2000 <sup>47</sup>      | Health Internet site                 | Cross-sectional study—sample obtained from breast cancer systemic therapy outpatient clinics over a 4-month period                                                                                                                                  | Self-reported demographic and health information; DV: self-reported use*                                                                                                                                                                                               | Women with breast cancer                                                                         | 79                                                                    | Canada      |
| Eikelboom and Atlas, 2005 <sup>80</sup> | Telemedicine                         | Cross-sectional study—sample obtained from four audiology clinics over a 6-month period                                                                                                                                                             | Self-reported demographic and clinical appointment information; DV: self-reported willingness to use telemedicine                                                                                                                                                      | Audiology clinics                                                                                | 116                                                                   | Australia   |
| Proude et al., 2004 <sup>72</sup>       | Health Internet site                 | Cross-sectional study—sample obtained from surgery clinics at two teaching hospitals over a 18-month period                                                                                                                                         | Self-reported demographic and health-related information; DV: self-reported Internet use for information about their condition*                                                                                                                                        | Elective surgery                                                                                 | 1,571                                                                 | Australia   |
| Christian et al., 2001 <sup>73</sup>    | Health Internet site                 | Cross-sectional study—sample population included patients referred to a medical genetics clinic in Canada                                                                                                                                           | Self-reported health-related information; DV: self-reported use of the Internet for health information*                                                                                                                                                                | Medical genetics clinic                                                                          | 200                                                                   | Canada      |
| Chae et al., 2000 <sup>82</sup>         | Telemedicine                         | Experiment (randomization not indicated)—random sample selected from a mental health center over a 3-month period; half of the sample was assigned to the telemedicine group and the other half was assigned to the face-to-face consultation group | Self-reported demographic information; DV: self-reported telemedicine acceptance score (comfort level during the consultation, patient's ability to express themselves, quality of the interpersonal relationship, and usefulness of the consultation) of telemedicine | Schizophrenia                                                                                    | 30                                                                    | Korea       |
| Kalichman et al., 2006 <sup>46</sup>    | Health Internet site                 | Longitudinal randomized controlled study—an 8-session intervention that focused on Internet information consumer skills versus a time-matched support group                                                                                         | Measures adapted from previously validated scales; DV: self-reported number of times of use                                                                                                                                                                            | HIV/AIDS                                                                                         | Baseline: 448; follow-up: 343 (3-month); 330 (6-month); 325 (9-month) | USA         |
| Carrell et al., 2006 <sup>89</sup>      | Computer-based health support system | Longitudinal study—adoption rates over a 30-month period were analyzed                                                                                                                                                                              | Automated data capture; Johns Hopkins ACG RUB score to indicate morbidity; DV: adoption rates were captured by electronic logs                                                                                                                                         | Patients enrolled care service                                                                   | 215,998                                                               | USA         |
| Larner, 2006 <sup>74</sup>              | Health Internet site                 | Longitudinal study—data collected during the first quarter of each of the years 2001-2005                                                                                                                                                           | Self-reported demographic information; DV: acceptance was indicated by asking patients about home Internet access and its use to seek medical information*                                                                                                             | General neurology clinic outpatients                                                             | Total=1,065 (over the five 3-month periods)                           | UK          |
| Fung et al., 2006 <sup>88</sup>         | Computer-based health support system | Longitudinal study—system use data collected between January 1999 and September 2002                                                                                                                                                                | Demographic information extracted from database; DV: frequency of use captured by the system                                                                                                                                                                           | Patients registered for e-health service                                                         | 270,987                                                               | USA         |

Or – Patient CHIT Acceptance Systematic Review

| Study                                  | Type of application                  | Design                                                                                                                                             | Method and dependent variable (DV)                                                                                                                                             | Type of patient                                                | N                                                    | Location |
|----------------------------------------|--------------------------------------|----------------------------------------------------------------------------------------------------------------------------------------------------|--------------------------------------------------------------------------------------------------------------------------------------------------------------------------------|----------------------------------------------------------------|------------------------------------------------------|----------|
| Wong et al., 2005 <sup>15</sup>        | Health Internet site                 | Longitudinal study—system use was assessed and analyzed at baseline and at 1-yr follow up                                                          | Self-reported demographic information; DV: self-reported use of the Internet for health information*                                                                           | Cardiovascular inpatients and outpatients                      | Baseline: 300; 1-yr follow up: 199                   | Canada   |
| Lu and Gustafson, 1994 <sup>9</sup>    | Computer-based health support system | Longitudinal study—two posttests: exploring stage and stable usage stage                                                                           | Survey and phone interview – survey adapted from validated measures; DV: frequency of system access captured by the system                                                     | HIV/AIDS                                                       | Exploring stage: 35; stable usage stage: 34          | USA      |
| Finkelstein et al., 2003 <sup>30</sup> | Home automated telemanagement system | Longitudinal study—two stages of testing: for stage 1, the system was assessed in a laboratory setting; for stage 2, the system was tested at home | Both semi-structured qualitative interview and survey; DV: acceptance was assessed through the interview and survey—patients were told to name reasons for high system utility | Home health care                                               | 1 <sup>st</sup> stage: 29; 2 <sup>nd</sup> stage: 12 | USA      |
| Hamoui et al., 2004 <sup>45</sup>      | Health Internet site                 | Natural experiment—sample obtained from the Bariatric Surgery Division and the Colorectal Surgery Division at a private academic institution       | Self-reported demographic information; DV: self-reported frequency of use                                                                                                      | Patients visited the bariatric and colorectal surgery division | 271                                                  | USA      |
| Boberg et al., 1995 <sup>6</sup>       | Computer-based health support system | Parent study was a randomized controlled study; data collected at pretest and posttests; Over-time usage was analyzed                              | Self-reported demographic information; single question to capture usefulness and ease of use; DV: number and patterns of system use was captured by the system                 | HIV/AIDS                                                       | 107                                                  | USA      |
| Tian and Robinson, 2008 <sup>78</sup>  | Health Internet site                 | Secondary analysis of the Health Information National Trends Survey II data collected by the National Cancer Institute                             | DV: Acceptance was indicated by the response to the question “In the past 12 months, have you looked for health or medical information for yourself on the Internet?”          | Cancer                                                         | 401                                                  | USA      |

\*Specific detail about how the variable was measured was not provided in the original article

**Table 3. The relationships of patient, human-technology interaction, organizational, and environmental factors with acceptance**

| Relationship | Patient factors (socio-demographic and health- and treatment-related)                                                                                                                                                                                                                                                                                                                                                                                                                                                                                                                                                                                                                                                                                                                                                                                                                                                                                                                                                                                                                                                                                                                                                                                                                                                                                                                                                                                                                                                                                                                                                                                                                                                                                                                                                                                                                                                                                                                                                                                                                                                                                                                                                                                                                                                                                                                                                                                                                                                                                                                                                                                                                                                                                                                                                                                                         | Human-technology interaction factors                                                                                                                                                                                                                                                                                                                                                                                                                                                                                                                                                     | Organizational factors                                                                                                                                                                                                                                                                                                                                                                                                                                                                                                                                                                                                                                                                                                                                                                                                                                                                                                                                                                    | Environmental factor                                                                                                                                                                                                                                                                                        |
|--------------|-------------------------------------------------------------------------------------------------------------------------------------------------------------------------------------------------------------------------------------------------------------------------------------------------------------------------------------------------------------------------------------------------------------------------------------------------------------------------------------------------------------------------------------------------------------------------------------------------------------------------------------------------------------------------------------------------------------------------------------------------------------------------------------------------------------------------------------------------------------------------------------------------------------------------------------------------------------------------------------------------------------------------------------------------------------------------------------------------------------------------------------------------------------------------------------------------------------------------------------------------------------------------------------------------------------------------------------------------------------------------------------------------------------------------------------------------------------------------------------------------------------------------------------------------------------------------------------------------------------------------------------------------------------------------------------------------------------------------------------------------------------------------------------------------------------------------------------------------------------------------------------------------------------------------------------------------------------------------------------------------------------------------------------------------------------------------------------------------------------------------------------------------------------------------------------------------------------------------------------------------------------------------------------------------------------------------------------------------------------------------------------------------------------------------------------------------------------------------------------------------------------------------------------------------------------------------------------------------------------------------------------------------------------------------------------------------------------------------------------------------------------------------------------------------------------------------------------------------------------------------------|------------------------------------------------------------------------------------------------------------------------------------------------------------------------------------------------------------------------------------------------------------------------------------------------------------------------------------------------------------------------------------------------------------------------------------------------------------------------------------------------------------------------------------------------------------------------------------------|-------------------------------------------------------------------------------------------------------------------------------------------------------------------------------------------------------------------------------------------------------------------------------------------------------------------------------------------------------------------------------------------------------------------------------------------------------------------------------------------------------------------------------------------------------------------------------------------------------------------------------------------------------------------------------------------------------------------------------------------------------------------------------------------------------------------------------------------------------------------------------------------------------------------------------------------------------------------------------------------|-------------------------------------------------------------------------------------------------------------------------------------------------------------------------------------------------------------------------------------------------------------------------------------------------------------|
| Positive     | <ul style="list-style-type: none"> <li>• Age-Older (1)<sup>68</sup></li> <li>• Higher education (19)<sup>29, 45, 47, 51, 52, 55-60, 62, 63, 66, 68-70, 72, 76</sup></li> <li>• Female (4)<sup>6, 49, 88, 89</sup></li> <li>• Caucasian (4)<sup>54, 69, 88, 157</sup></li> <li>• Married or in a relationship (2)<sup>53, 56</sup></li> <li>• Live alone (1)<sup>6</sup></li> <li>• Employed (3)<sup>33, 56, 72</sup></li> <li>• Have/had health care occupations (1)<sup>52</sup></li> <li>• Higher income level (7)<sup>45, 59, 60, 63, 64, 66, 68</sup></li> <li>• Socially deprived (1)<sup>29</sup></li> <li>• Live in higher socioeconomic status neighborhood (1)<sup>88</sup></li> <li>• Community type               <ul style="list-style-type: none"> <li>- Consult medical practices in urban areas (vs. rural) (1)<sup>67</sup></li> <li>- Varied by region of the United States (1)<sup>51</sup></li> </ul> </li> <li>• No health insurance coverage (1)<sup>49</sup></li> <li>• Have knowledge of the English language (2)<sup>67, 77</sup></li> <li>• Have school-age children at home (1)<sup>29</sup></li> <li>• Prior experience, exposure, or awareness in computer or health technology               <ul style="list-style-type: none"> <li>- Own a computer (3)<sup>61, 70, 75</sup></li> <li>- Have previous computing experience (1)<sup>70</sup></li> <li>- Have previous Internet use (2)<sup>55, 66</sup></li> <li>- More frequent Internet users (3)<sup>64, 68, 73</sup></li> <li>- Have previous awareness of telemedicine (1)<sup>80</sup></li> <li>- Have Previous use of health Web sites (1)<sup>29</sup></li> <li>- Have Internet access at home (3)<sup>55, 61, 77</sup></li> <li>- Higher computer literacy (1)<sup>86</sup></li> </ul> </li> <li>• Higher health information seeking preference (2)<sup>29, 87</sup></li> <li>• Health status               <ul style="list-style-type: none"> <li>- Less severely ill patients (1)<sup>82</sup></li> <li>- More severely ill patients (2)<sup>49, 67</sup></li> <li>- Higher morbidity (1)<sup>89</sup></li> <li>- Have acute disease (vs. chronic) (1)<sup>67</sup></li> <li>- Bariatric patients (vs. colorectal) (1)<sup>45</sup></li> <li>- Prior experience of severe diseases (1)<sup>68</sup></li> <li>- Presence of a specific diagnosis (1)<sup>73</sup></li> <li>- Cancer diagnosis – gynecologic and breast (1)<sup>50</sup></li> <li>- Chronic illness condition – gynecological, chronic sinusitis, arthritis, migraine, or thyroid condition (1)<sup>49</sup></li> </ul> </li> <li>• Other health- or treatment-related factors               <ul style="list-style-type: none"> <li>- Higher health care need (2)<sup>88, 92</sup></li> <li>- Difficult to manage the condition (1)<sup>49</sup></li> <li>- Reason for referral (1)<sup>73</sup></li> </ul> </li> </ul> | <ul style="list-style-type: none"> <li>• Higher perceived usefulness (6)<sup>6, 29, 63, 87, 91, 92</sup></li> <li>• Higher perceived ease of use (4)<sup>6, 9, 87, 91</sup></li> <li>• Higher belief that the use of CHITs can lead to positive outcomes (i.e., reduction in time, cost, and traveling distance; self-testing results being reviewed in a timely manner; having more comprehensive disease management) (2)<sup>80, 90</sup></li> <li>• Higher Internet dependence† (1)<sup>87</sup></li> <li>• Higher self-efficacy toward computer/CHIT (2)<sup>29, 91</sup></li> </ul> | <ul style="list-style-type: none"> <li>• Less satisfied with medical care services (1)<sup>49</sup></li> <li>• Less satisfied with the amount of disease treatment-related information given by physician (1)<sup>47</sup></li> <li>• Less satisfied with health plan (1)<sup>49</sup></li> <li>• Less reliance on others for transport (1)<sup>80</sup></li> <li>• Received Internet skill training (1)<sup>46</sup></li> <li>• Attend one of the two study hospitals (1)<sup>72</sup></li> <li>• Patient at an academic medical center (vs. veterans affairs hospital) (2)<sup>54, 157</sup></li> <li>• Have a regular primary care provider (1)<sup>88</sup></li> <li>• Higher difficulty obtaining the necessary health care access (1)<sup>49</sup></li> <li>• Higher trust belief about the health care provider (1)<sup>92</sup></li> <li>• Higher trust belief about the technology vendor (1)<sup>92</sup></li> <li>• Higher external control belief (1)<sup>91</sup></li> </ul> | <ul style="list-style-type: none"> <li>• Patient location               <ul style="list-style-type: none"> <li>- Experiencing telemedicine in homes (vs. in nursing homes) (1)<sup>81</sup></li> <li>- Experiencing telemedicine at the prison (vs. medical center) (1)<sup>84</sup></li> </ul> </li> </ul> |
| Mixed        | <ul style="list-style-type: none"> <li>• Gender (2)<sup>55, 80</sup></li> <li>• Education (1)<sup>75</sup></li> <li>• Race (1)<sup>6</sup></li> </ul>                                                                                                                                                                                                                                                                                                                                                                                                                                                                                                                                                                                                                                                                                                                                                                                                                                                                                                                                                                                                                                                                                                                                                                                                                                                                                                                                                                                                                                                                                                                                                                                                                                                                                                                                                                                                                                                                                                                                                                                                                                                                                                                                                                                                                                                                                                                                                                                                                                                                                                                                                                                                                                                                                                                         |                                                                                                                                                                                                                                                                                                                                                                                                                                                                                                                                                                                          |                                                                                                                                                                                                                                                                                                                                                                                                                                                                                                                                                                                                                                                                                                                                                                                                                                                                                                                                                                                           |                                                                                                                                                                                                                                                                                                             |

Or – Patient CHIT Acceptance Systematic Review

| Relationship    | Patient factors (socio-demographic and health- and treatment-related)                                                                                                                                                                                                                                                                                                                                                                                                                                                                                                                                                                                                                                                                                                                                                                                                                                                                                                                                                                                                                                                                                                                                                                                                                                                                                                                                                                                                                                                                                                                                                                                                                                                                                                                                                                                                                                              | Human-technology interaction factors                                                                                                                                                                                                                                                                                                                                                                                                                                                                                          | Organizational factors                                                                                                                                                                                                                                                                                                                                                                                | Environmental factor |
|-----------------|--------------------------------------------------------------------------------------------------------------------------------------------------------------------------------------------------------------------------------------------------------------------------------------------------------------------------------------------------------------------------------------------------------------------------------------------------------------------------------------------------------------------------------------------------------------------------------------------------------------------------------------------------------------------------------------------------------------------------------------------------------------------------------------------------------------------------------------------------------------------------------------------------------------------------------------------------------------------------------------------------------------------------------------------------------------------------------------------------------------------------------------------------------------------------------------------------------------------------------------------------------------------------------------------------------------------------------------------------------------------------------------------------------------------------------------------------------------------------------------------------------------------------------------------------------------------------------------------------------------------------------------------------------------------------------------------------------------------------------------------------------------------------------------------------------------------------------------------------------------------------------------------------------------------|-------------------------------------------------------------------------------------------------------------------------------------------------------------------------------------------------------------------------------------------------------------------------------------------------------------------------------------------------------------------------------------------------------------------------------------------------------------------------------------------------------------------------------|-------------------------------------------------------------------------------------------------------------------------------------------------------------------------------------------------------------------------------------------------------------------------------------------------------------------------------------------------------------------------------------------------------|----------------------|
| Non-linear      | <ul style="list-style-type: none"> <li>Age (6)<sup>56, 62, 67, 80, 88, 89</sup></li> </ul>                                                                                                                                                                                                                                                                                                                                                                                                                                                                                                                                                                                                                                                                                                                                                                                                                                                                                                                                                                                                                                                                                                                                                                                                                                                                                                                                                                                                                                                                                                                                                                                                                                                                                                                                                                                                                         |                                                                                                                                                                                                                                                                                                                                                                                                                                                                                                                               |                                                                                                                                                                                                                                                                                                                                                                                                       |                      |
| Negative        | <ul style="list-style-type: none"> <li>Lower perceived quality of life (1)<sup>79</sup></li> <li>Poor health literacy (1)<sup>86</sup></li> <li>Health status               <ul style="list-style-type: none"> <li>AIDS stage – Symptomatic (vs. nonsymptomatic) (1)<sup>6</sup></li> <li>Physical limitations – mobility, upper extremity limitations (2)<sup>86, 90</sup></li> <li>Visual limitations (1)<sup>90</sup></li> <li>Cognitive limitations/impairments (2)<sup>86, 90</sup></li> <li>Higher level of depressive symptoms (1)<sup>91</sup></li> </ul> </li> <li>Age-Older (19)<sup>6, 47, 50-55, 57, 59, 61, 63, 65, 70, 72, 74, 75, 85, 93</sup></li> <li>Have a religious preference (1)<sup>6</sup></li> </ul>                                                                                                                                                                                                                                                                                                                                                                                                                                                                                                                                                                                                                                                                                                                                                                                                                                                                                                                                                                                                                                                                                                                                                                                      | <ul style="list-style-type: none"> <li>Computer anxiety/fear of technology (3)<sup>86, 90, 91</sup></li> </ul>                                                                                                                                                                                                                                                                                                                                                                                                                |                                                                                                                                                                                                                                                                                                                                                                                                       |                      |
| No relationship | <ul style="list-style-type: none"> <li>Age (13)<sup>29, 45, 48, 58, 60, 64, 66, 69, 76, 78, 81-83</sup></li> <li>Gender (26)<sup>29, 45, 48, 51, 53, 56-59, 61, 62, 64, 65, 67-69, 72, 74, 75, 77, 81-83, 85, 93, 158</sup></li> <li>Education(9)<sup>6, 48, 64, 77, 81-83, 85, 93</sup></li> <li>Marital Status (6)<sup>6, 57, 58, 61, 72, 75</sup></li> <li>Race (5)<sup>29, 57, 60, 63, 85</sup></li> <li>Health insurance status (5)<sup>6, 61, 69, 83, 88</sup></li> <li>Income level (7)<sup>6, 56, 57, 75, 76, 83, 93</sup></li> <li>Employment status (4)<sup>6, 69, 75, 77</sup></li> <li>Computer experience (5)<sup>29, 77, 81, 85, 91</sup></li> <li>Community type (2)<sup>56, 66</sup></li> <li>Knowledge of the English language (2)<sup>29, 75</sup></li> <li>Having school-age children at home (1)<sup>61</sup></li> <li>Social deprivation (1)<sup>53</sup></li> <li>Social security (1)<sup>56</sup></li> <li>Financial status (1)<sup>58</sup></li> <li>Being born in Canada (1)<sup>75</sup></li> <li>Health status               <ul style="list-style-type: none"> <li>Number of chronic diseases (1)<sup>69</sup></li> <li>Breast cancer stage (1)<sup>60</sup></li> <li>Rheumatological diagnosis (1)<sup>53</sup></li> <li>Median disease/symptom duration (3)<sup>53, 59, 77</sup></li> <li>Disease category/diagnosis (2)<sup>57, 67</sup></li> <li>Having a limiting long term illness (1)<sup>29</sup></li> <li>Smoking status (1)<sup>72</sup></li> <li>Melanoma stage (1)<sup>65</sup></li> <li>Number of past medical problems (1)<sup>59</sup></li> <li>Functional disability resulting from arthritis (1)<sup>58</sup></li> <li>Comorbidity (1)<sup>58</sup></li> <li>Daily stress (1)<sup>58</sup></li> <li>Hand problem diagnosis (1)<sup>71</sup></li> <li>Cardiovascular diagnosis (1)<sup>75</sup></li> <li>Psychiatric diagnosis (1)<sup>77</sup></li> </ul> </li> </ul> | <ul style="list-style-type: none"> <li>Perceived usefulness (1)<sup>9</sup></li> <li>Perceived ease of use (1)<sup>92</sup></li> <li>Technology characteristics               <ul style="list-style-type: none"> <li>System set-up time and vocal communication and image quality (1)<sup>81</sup></li> </ul> </li> <li>Technology as support (1)<sup>58</sup></li> <li>Intrinsic motivation (1)<sup>87</sup></li> <li>Perceived reliability/exactitude of health information on the Internet (2)<sup>75, 77</sup></li> </ul> | <ul style="list-style-type: none"> <li>Satisfaction with medical care/treatment (2)<sup>77, 87</sup></li> <li>Satisfaction with the amount of general health information given by physician (1)<sup>47</sup></li> <li>Assessment type (face-to-face vs. telemedicine) (1)<sup>82</sup></li> <li>Physician type (1)<sup>67</sup></li> <li>Clinic type (public vs. private) (1)<sup>64</sup></li> </ul> |                      |

Or – Patient CHIT Acceptance Systematic Review

| Relationship                        | Patient factors (socio-demographic and health- and treatment-related)                                                                                                                                                                                                                                                                                                                                                                                                                                                                                                                                                  | Human-technology interaction factors | Organizational factors | Environmental factor |
|-------------------------------------|------------------------------------------------------------------------------------------------------------------------------------------------------------------------------------------------------------------------------------------------------------------------------------------------------------------------------------------------------------------------------------------------------------------------------------------------------------------------------------------------------------------------------------------------------------------------------------------------------------------------|--------------------------------------|------------------------|----------------------|
| No relationship<br>( <i>cont.</i> ) | <ul style="list-style-type: none"> <li>• Other health- or treatment-related factors                             <ul style="list-style-type: none"> <li>- Number of current prescriptions (1)<sup>69</sup></li> <li>- Previous clinic visits (1)<sup>85</sup></li> <li>- Length of time since diagnosis (1)<sup>60</sup></li> <li>- Number of sources of health information used in the past year (1)<sup>29</sup></li> <li>- Health care knowledge (1)<sup>87</sup></li> <li>- Health care need (1)<sup>87</sup></li> </ul> </li> <li>Previous hospitalization in psychiatric institutions (1)<sup>77</sup></li> </ul> |                                      |                        |                      |
| Result not reported                 | <ul style="list-style-type: none"> <li>• Gender (1)<sup>76</sup></li> <li>• Race (1)<sup>83</sup></li> </ul>                                                                                                                                                                                                                                                                                                                                                                                                                                                                                                           |                                      |                        |                      |

†The relationship was also mediated by perceived usefulness of the technology  
 () indicates number of studies found the relationship
